# Supplementary material
Source: Research Square preprint supplement (doi:10.21203/rs.3.rs-10187873/v1)
Supplement: Supplementary file 1 [file 0c8dc004b20623187e3b05a7.docx]

**Table 1.** Classification some of the environmental variables used in this study.

| Abbreviation | Variables | Abbreviation | Variables |  |
| --- | --- | --- | --- | --- |
|  |  | B2:B7 | Landsat-8 OLI six bands and thermal infrared band | Landsat OLI |
| TC | Total Curvature | CNBL | Channel Network Base Level | Topographic variables |
| MPI | Morphometric Protection Index | AVD | Average Vertical Distance |
| MRRTF | (Melton Ruggedness Number) | AH | Analytical Hillshading |
| TRI | Terrain Ruggedness Index | MSP | Mid.Slope Position |
| TSC | Terrain Surface Convexity | G | Gradient |
| TST | Terrain Surface Texture | CS | Catchment Slope |
| RL | Ridge Level | SL | Slope Length |
| MH | Maximum Height | S | Slope |
| NH | Normalized Height | A | Aspect |
| SH | Standardized Height | C | Convexity |
| RSP | Relative Slope Position | DC | Downslope Curvature |
| MCA | Modified Catchment Area | LDC | Local Downslope Curvature |
| SCA | Specific Catchment Area | LUC | Local Upslope Curvature |
| TCA | Total Catchment Area | LC | Longitudinal Curvature |
| SA | Surface Area | PC | Plan Curvature |
| RSA | Real Surface Area | TgC | Tangential Curvature |
| LSF | LS Factor | CFT | Compare to Flat Terrain |
| CITI | CIT Index (Convergence Index Threshold) | CIT | Channel Initiation Threshold | Variables related to the network and water flow |
| SPI | Stream Power Index | CND | Channel Network Distance |
| CB | Cell Balance | OFD | Overland Flow Distance |
|  |  | HOFD | Horizontal Overland Flow Distance |
| DAH | Diurnal Anisotropic Heating | HS | Hillshade | Radiation, energy and climate indicators |
| TVF | Terrain View Factor | SVF | Sky View Factor |
| MBI | Mass Balance Index | TI | Total Insolation |
| N | Northness | DI | Direct Insolation |
|  |  | DDR | Direct to Diffuse Ratio |
| PVI | Perpendicular Vegetation Index | NDVI | Normalized Difference Vegetation Index | Vegetation cover indices and spectral indices |
| RVI | Ratio Vegetation Index | TSAVI | Transformed Soil Adjusted Vegetation Index |
|  | B2, B5, B7 | TVI | Transformed Vegetation Index |
| TTVI | Thiam.s Transformed Vegetation Index | CTVI | Corrected Transformed Vegetation Index |
| GSI | Grain Size Index | EVI | Enhanced Vegetation Index |
|  |  | DVI | Difference Vegetation Index |
| RNR | Rock Outcrop Normalized Ratio | CNR | Carbonate Normalized Ratio | Chemical and geological variables |

**Table 2.** Descriptive statistics of soil pH.

| *p*-value | KURT | SKEW | CV (%) | Std.d | Mean | Median | Max | Min | Soil properties |
| --- | --- | --- | --- | --- | --- | --- | --- | --- | --- |
| 0.00011 | -0.34 | -0.65 | 5.2 | 0.397 | 7.65 | 7.7 | 8.3 | 6.65 | pH |

**Table 3.** The number and types of selected variables used in the feature selection methods under study.

| Sample variables | Number of variables | Variable reduction method |
| --- | --- | --- |
| MPI, AVD, CFT, CNR, … | 10 | VIF |
| CNR, LUC, PVI, SL. | 4 | RFE |
| LSF, TgC, MH, N, B7. | 5 | SA-FS1 |
| AH, CS, Dem, C, CTVI, … | 24 | SA-FS2 |
| SL, DDR, LC, PVI, … | 5 | GA-FS1 |
| CIT, B5, EVI, MRRTF, PVI, … | 10 | GA-FS2 |

**Table 4.** Number of variables and Sample variables in properties selection method.

| Sample variables | Number of variables | Properties Selection Method |
| --- | --- | --- |
| MPI, AVD, CFT, CNR, … | 10 | VIF |
| MRVBF, MRRTF, CND, TST, … | 5 | RFE |
| LSF, TgC, MH, N, B7. | 5 | SA-FS1 |
| AH, CS, Dem, C, CTVI, … | 24 | SA-FS2 |
| SL, DDR, LC, PVI, … | 5 | GA-FS1 |
| CIT, B5, EVI, MRRTF, PVI, … | 10 | GA-FS2 |

**Table 5.** The number of repetitions variable in methods.

| Variable type | The number of repetitions | Variable |
| --- | --- | --- |
| Topo-related variables | 4 | SL |
| Topo-related variables | 3 | LUC |
| Topo-related variables | 3 | MRRTF |
| Hydrology-related variables | 3 | DDR |
| Vegetation-related variables | 2 | PVI |
| Topo-related variables | 2 | SCA |
| Geological | 2 | CNR |
| Topo-related variables | 2 | TST |
| Topo-related variables | 2 | N |
| Hydrology-related variables | 2 | OFD |

**Table 6.** Validation of machine learning models using different feature selection methods.

| Variable reduction method | Statistical  parameters | Calibration data | | | | Validation data | | | |
| --- | --- | --- | --- | --- | --- | --- | --- | --- | --- |
| Models | | | | Models | | | |
| SVM | RF | Cubist | XGBoost | SVM | RF | Cubist | XGBoost |
| VIF | R2 | 0.55 | 0.65 | 0.67 | 0.68 | 0.15 | 0.37 | 0.22 | 0.26 |
| concordance | 0.71 | 0.74 | 0.80 | 0.80 | 0.34 | 0.43 | 0.42 | 0.45 |
| MSE | 0.07 | 0.04 | 0.06 | 0.04 | 0.13 | 0.15 | 0.16 | 0.15 |
| RMSE | 0.27 | 0.21 | 0.24 | 0.21 | 0.36 | 0.38 | 0.39 | 0.38 |
| bias | 0.01 | 0 | 0 | 0.01 | -0.06 | 0.08 | -0.09 | -0.09 |
| RFE | R2 | 0.51 | 0.66 | 0.68 | 0.65 | 0.19 | 0.32 | 0.24 | 0.02 |
| concordance | 0.68 | 0.76 | 0.80 | 0.79 | 0.39 | 0.42 | 0.43 | 0.36 |
| MSE | 0.08 | 0.04 | 0.05 | 0.044 | 0.11 | 0.15 | 0.17 | 0.199 |
| RMSE | 0.29 | 0.21 | 0.24 | 0.21 | 0.33 | 0.39 | 0.41 | 0.43 |
| bias | 0.02 | 0.003 | 0.006 | 0.005 | 0.02 | 0.08 | -0.105 | 0.08 |
| SA-FS1 | R2 | 0.56 | 0.69 | 0.68 | 0.50 | 0.11 | 0.32 | 0.17 | 0.62 |
| concordance | 0.72 | 0.77 | 0.81 | 0.68 | 0.27 | 0.39 | 0.37 | 0.74 |
| MSE | 0.07 | 0.04 | 0.06 | 0.072 | 0.14 | 0.14 | 0.16 | 0.075 |
| RMSE | 0.27 | 0.20 | 0.24 | 0.27 | 0.38 | 0.38 | 0.39 | 0.27 |
| bias | 0.002 | -0.004 | 0.005 | -0.05 | -0.004 | 0.09 | -0.08 | 0.033 |
| SA-FS2 | R2 | 0.61 | 0.67 | 0.70 | 0.65 | 0.18 | 0.37 | 0.26 | 0.21 |
| concordance | 0.75 | 0.76 | 0.82 | 0.78 | 0.37 | 0.43 | 0.46 | 0.38 |
| MSE | 0.06 | 0.04 | 0.05 | 0.045 | 0.13 | 0.14 | 0.13 | 0.18 |
| RMSE | 0.25 | 0.20 | 0.22 | 0.21 | 0.35 | 0.38 | 0.36 | 0.43 |
| bias | -0.00 | 0.00 | -0.00 | -0.002 | -0.00 | 0.08 | -0.10 | 0.07 |
| GA-FS1 | R2 | 0.44 | 0.71 | 0.44 | 0.63 | 0.18 | 0.27 | 0.18 | 0.45 |
| concordance | 0.62 | 0.80 | 0.62 | 0.77 | 0.37 | 0.44 | 0.37 | 0.57 |
| MSE | 0.08 | 0.04 | 0.08 | 0.047 | 0.14 | 0.10 | 0.14 | 0.12 |
| RMSE | 0.29 | 0.21 | 0.29 | 0.22 | 0.38 | 0.32 | 0.38 | 0.35 |
| bias | 0.04 | -0.00 | 0.04 | -0.001 | 0.03 | -0.09 | 0.03 | 0.06 |
| GA-FS2 | R2 | 0.51 | 0.64 | 0.68 | 0.58 | 0.06 | 0.26 | 0.08 | 0.31 |
| concordance | 0.68 | 0.74 | 0.81 | 0.74 | 0.25 | 0.41 | 0.29 | 0.44 |
| MSE | 0.07 | 0.05 | 0.05 | 0.052 | 0.19 | 0.11 | 0.21 | 0.15 |
| RMSE | 0.27 | 0.24 | 0.22 | 0.23 | 0.44 | 0.33 | 0.46 | 0.39 |
| bias | 0.022 | 0 | 0 | -0.001 | 0.06 | -0.08 | -0.05 | 0.062 |
