# Supplementary material
Source: Research Square preprint supplement (doi:10.21203/rs.3.rs-10187873/v1)
Supplement: Supplementary file 2 [file b0fb29a20a5ee7c6f0ff6396.docx]

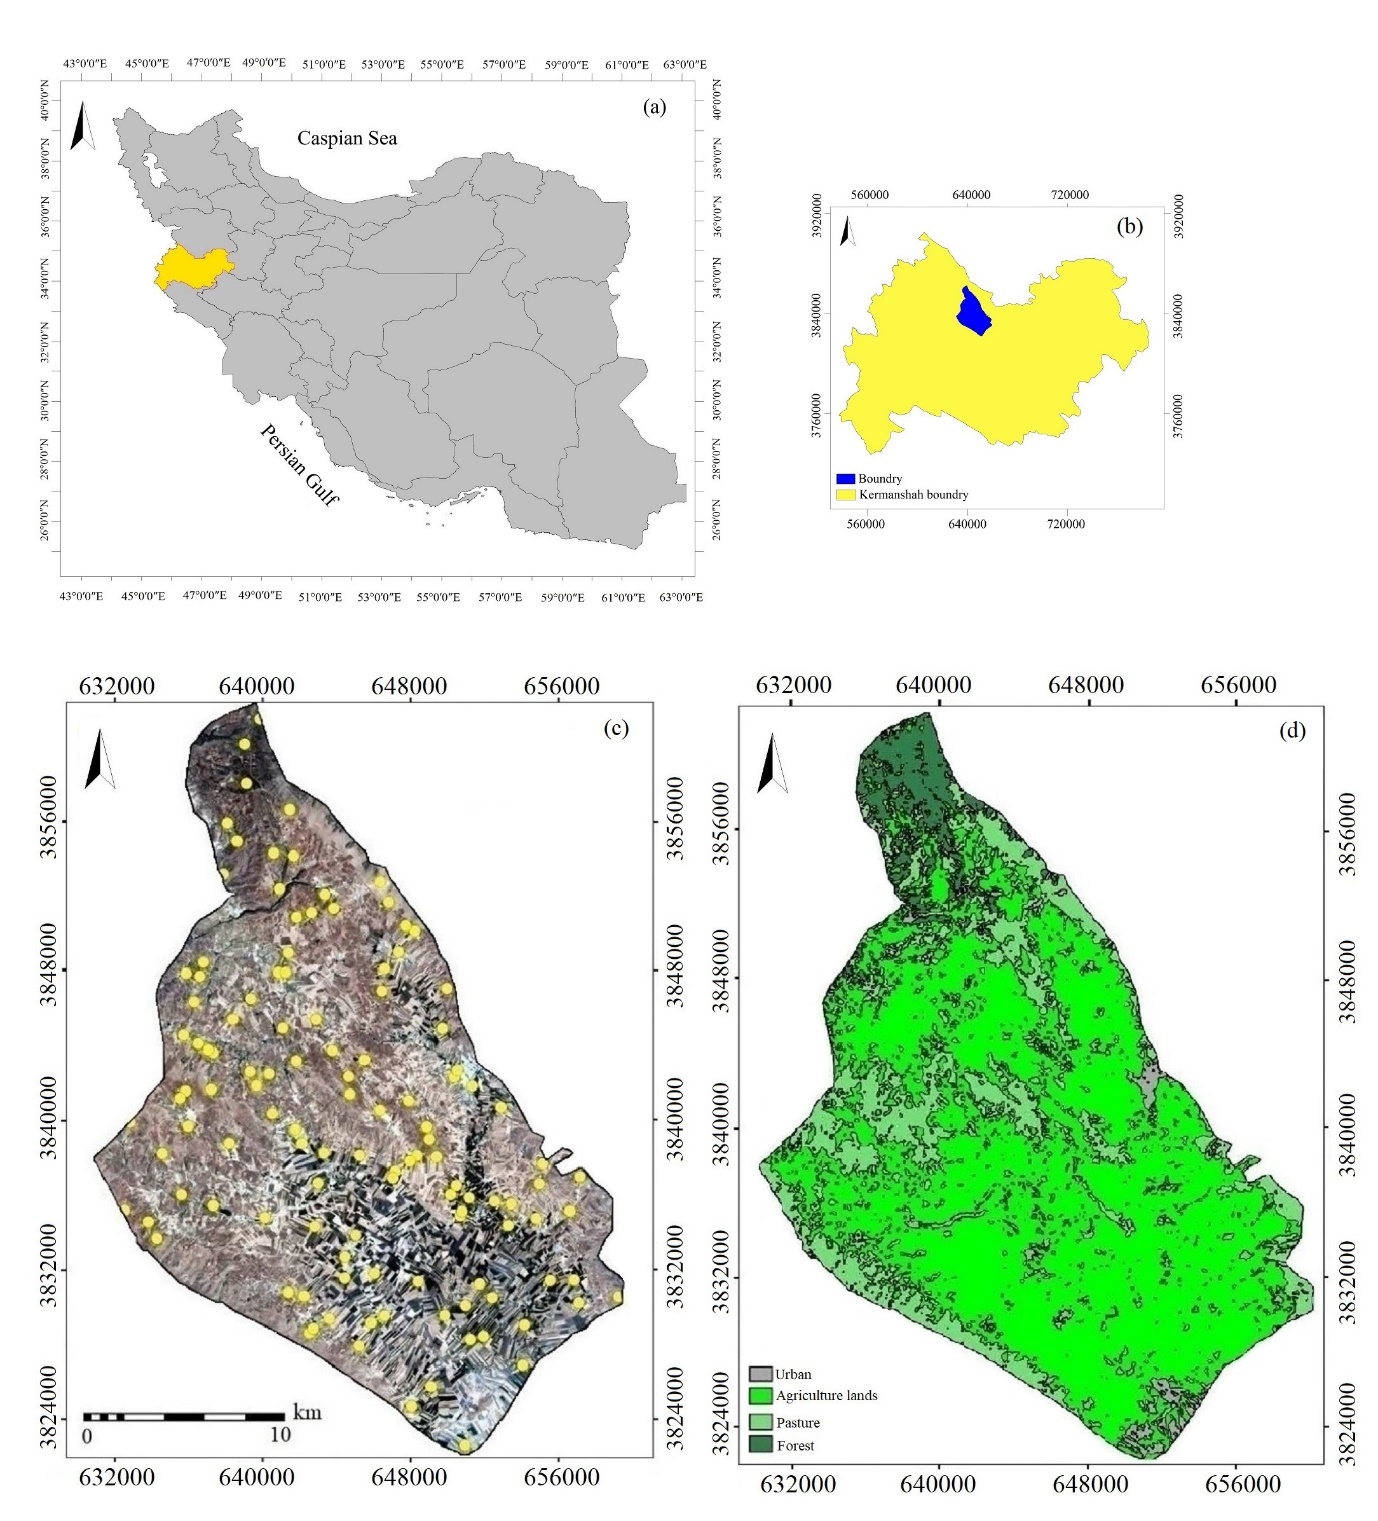


**Fig. 1.** (a) Location of Kermanshah Province within Iran; (b) location of the study area within Kermanshah Province; (c) spatial distribution of soil sampling points; and (d) land‑use map of the study area (UTM projection, and Zone 38).


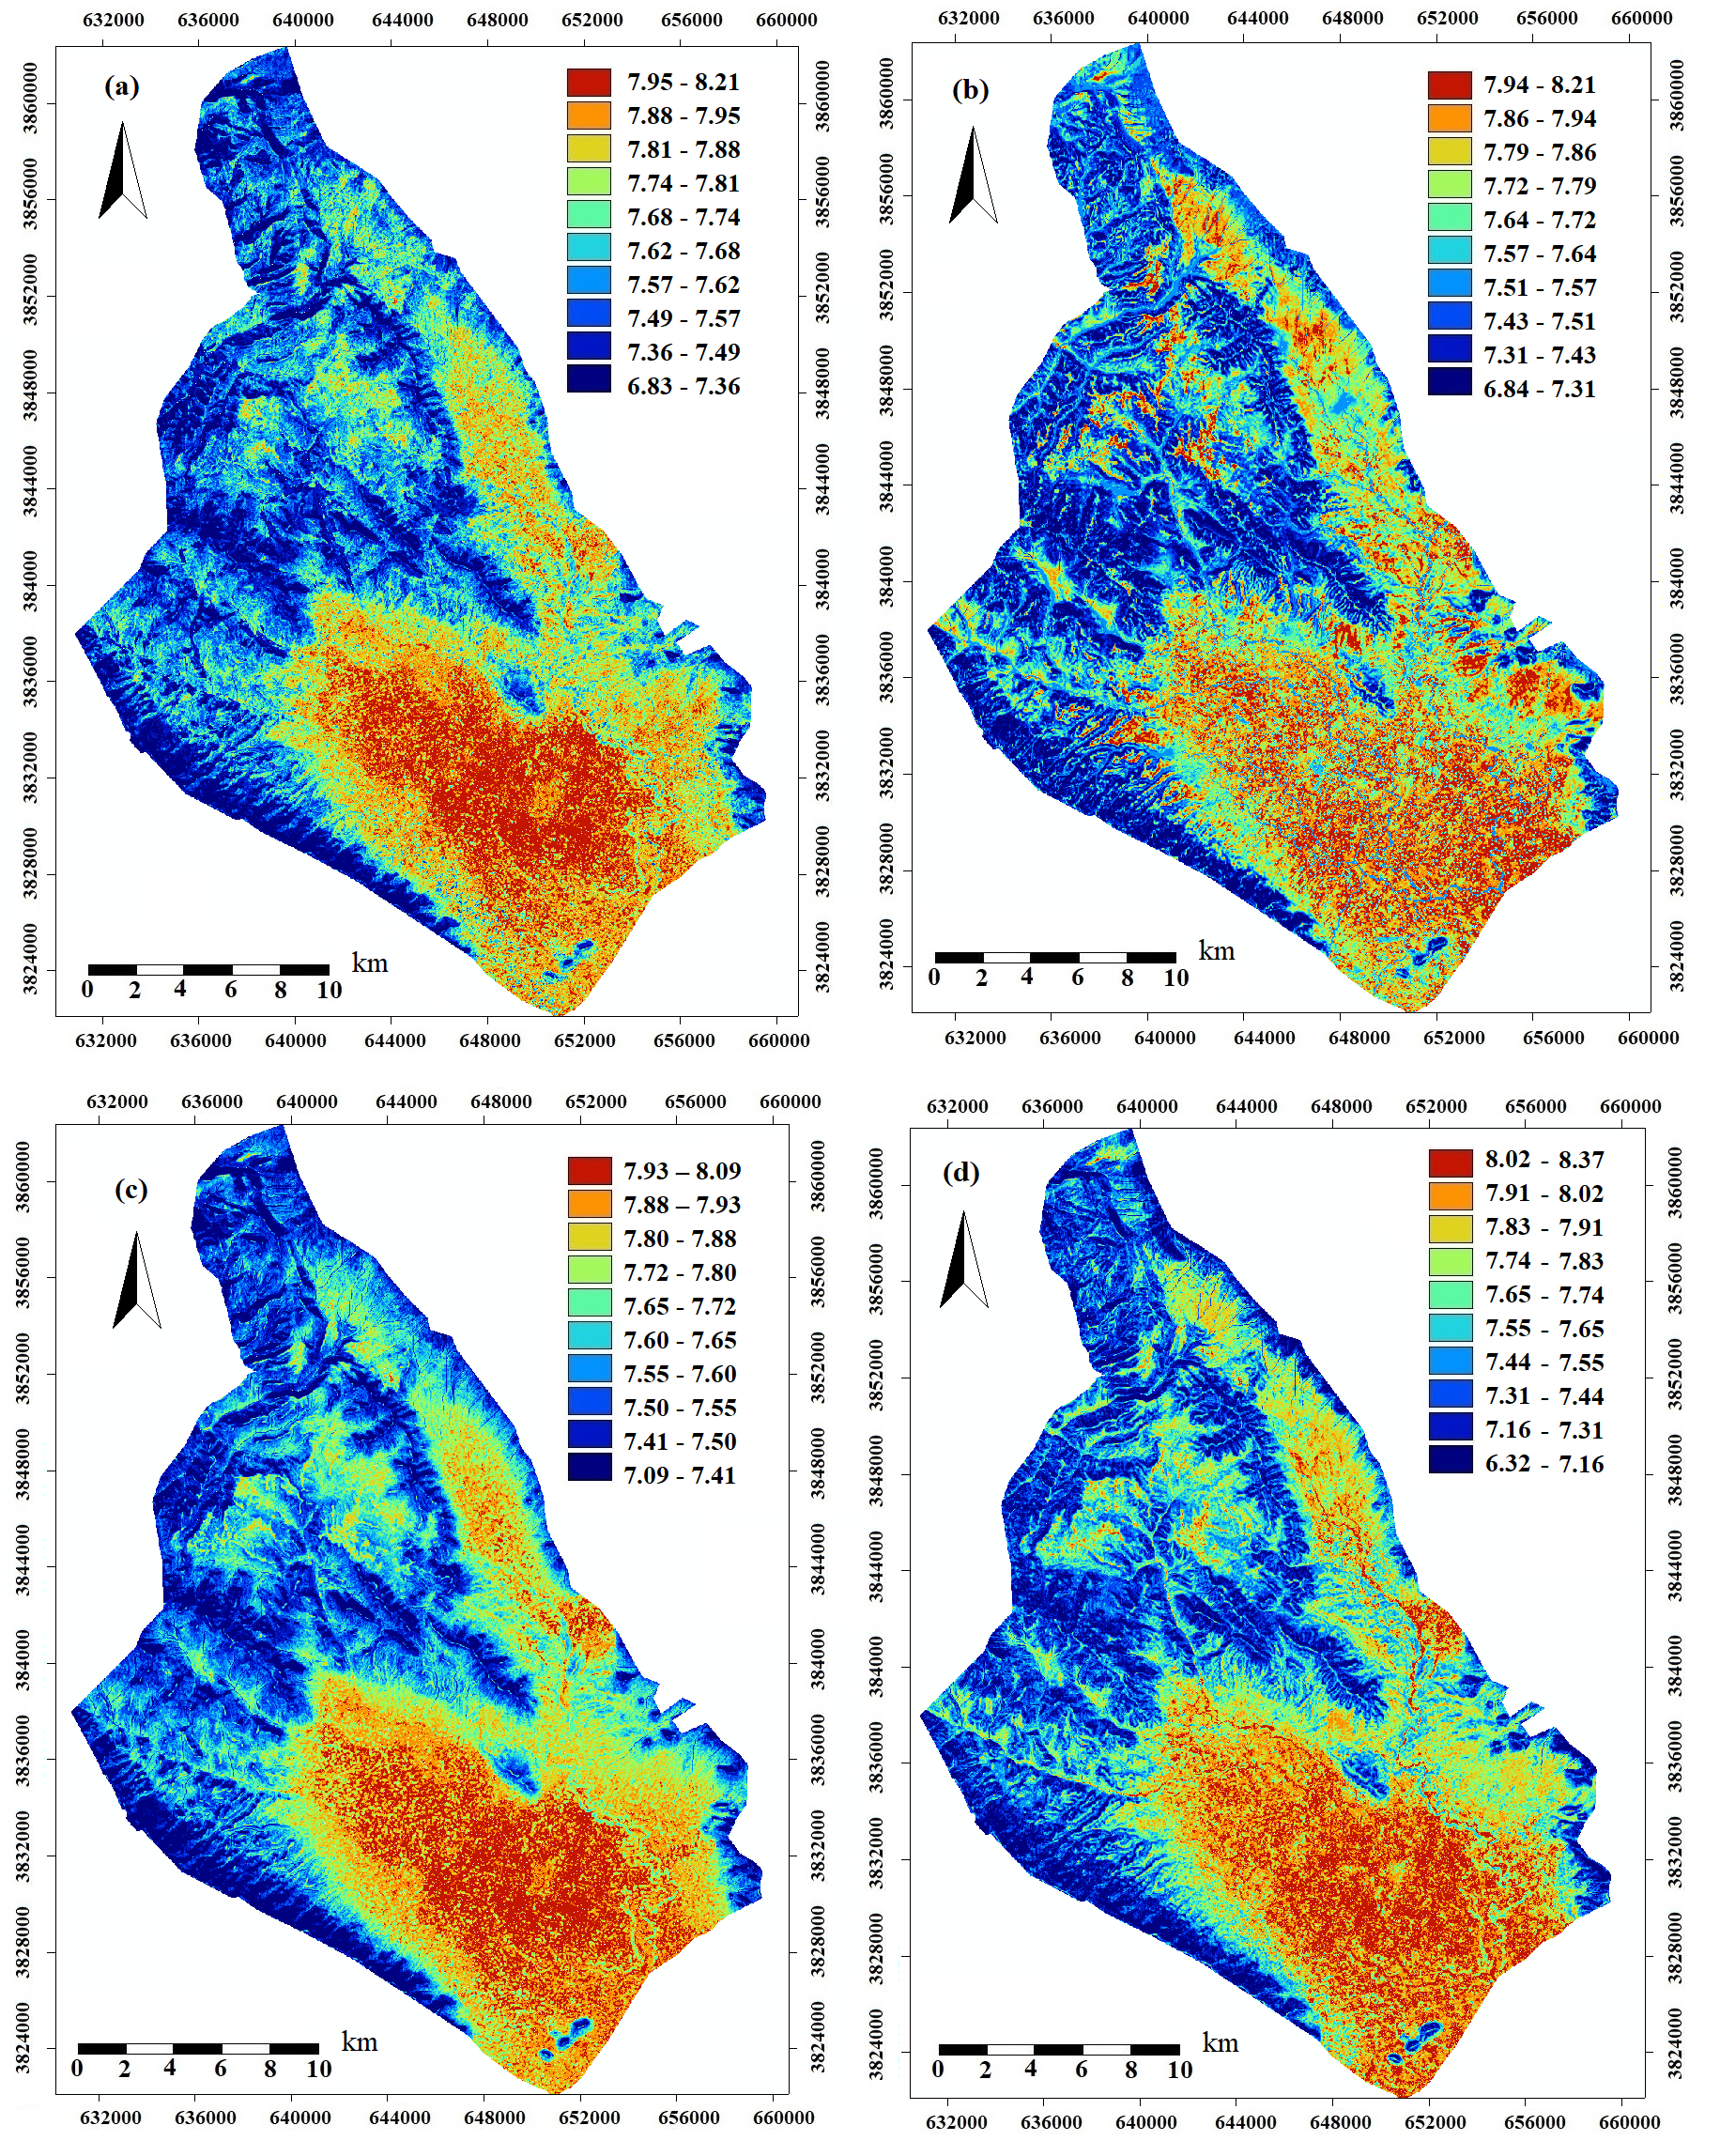


**Fig 2.** Spatial prediction maps of soil pH produced by (a) XGBoost, (b) SVM, (c) RF, and (d) Cubist models using the VIF method.


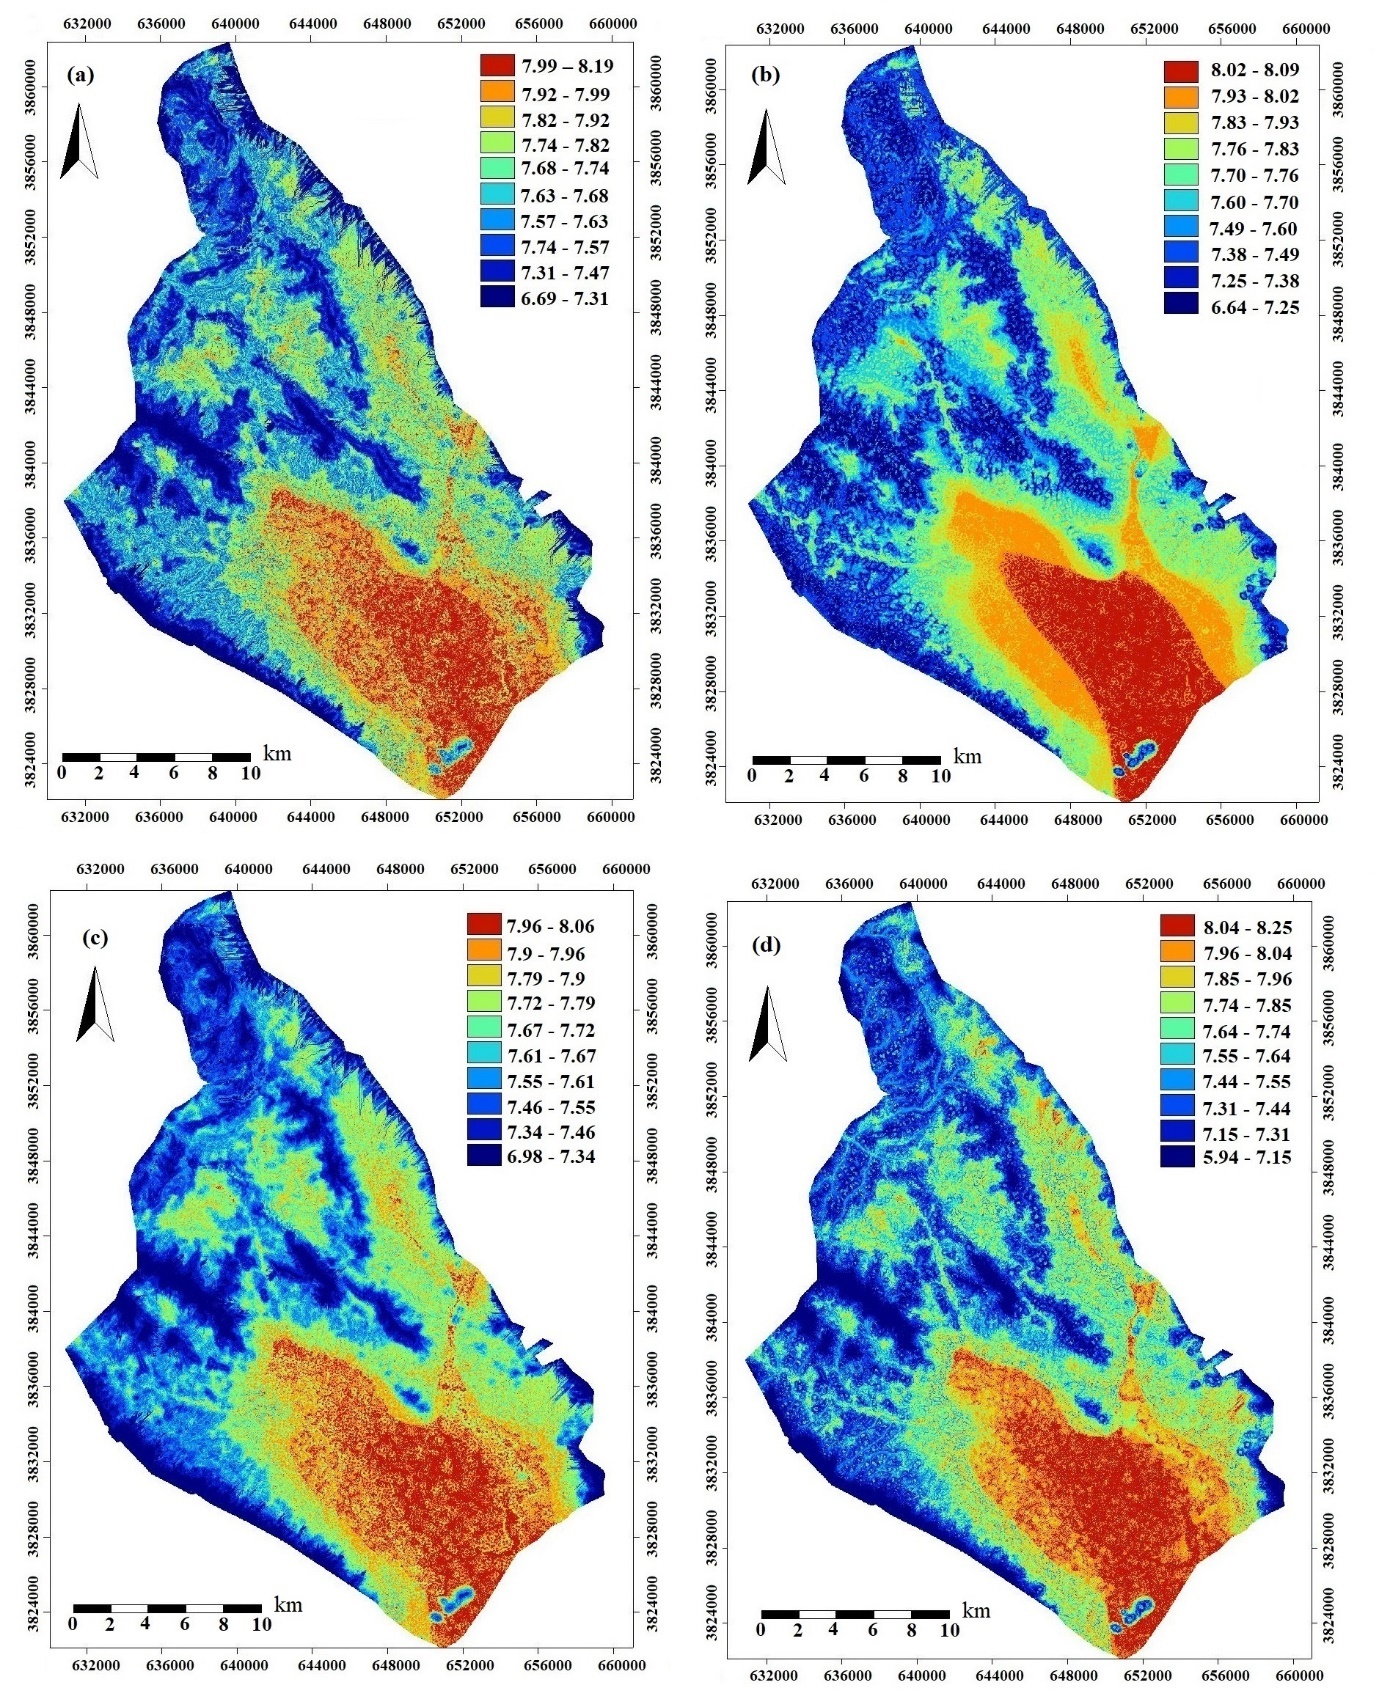


**Fig 3.** Spatial prediction maps of soil pH produced by (a) XGBoost, (b) SVM, (c) RF, and (d) Cubist models using the RFE method.


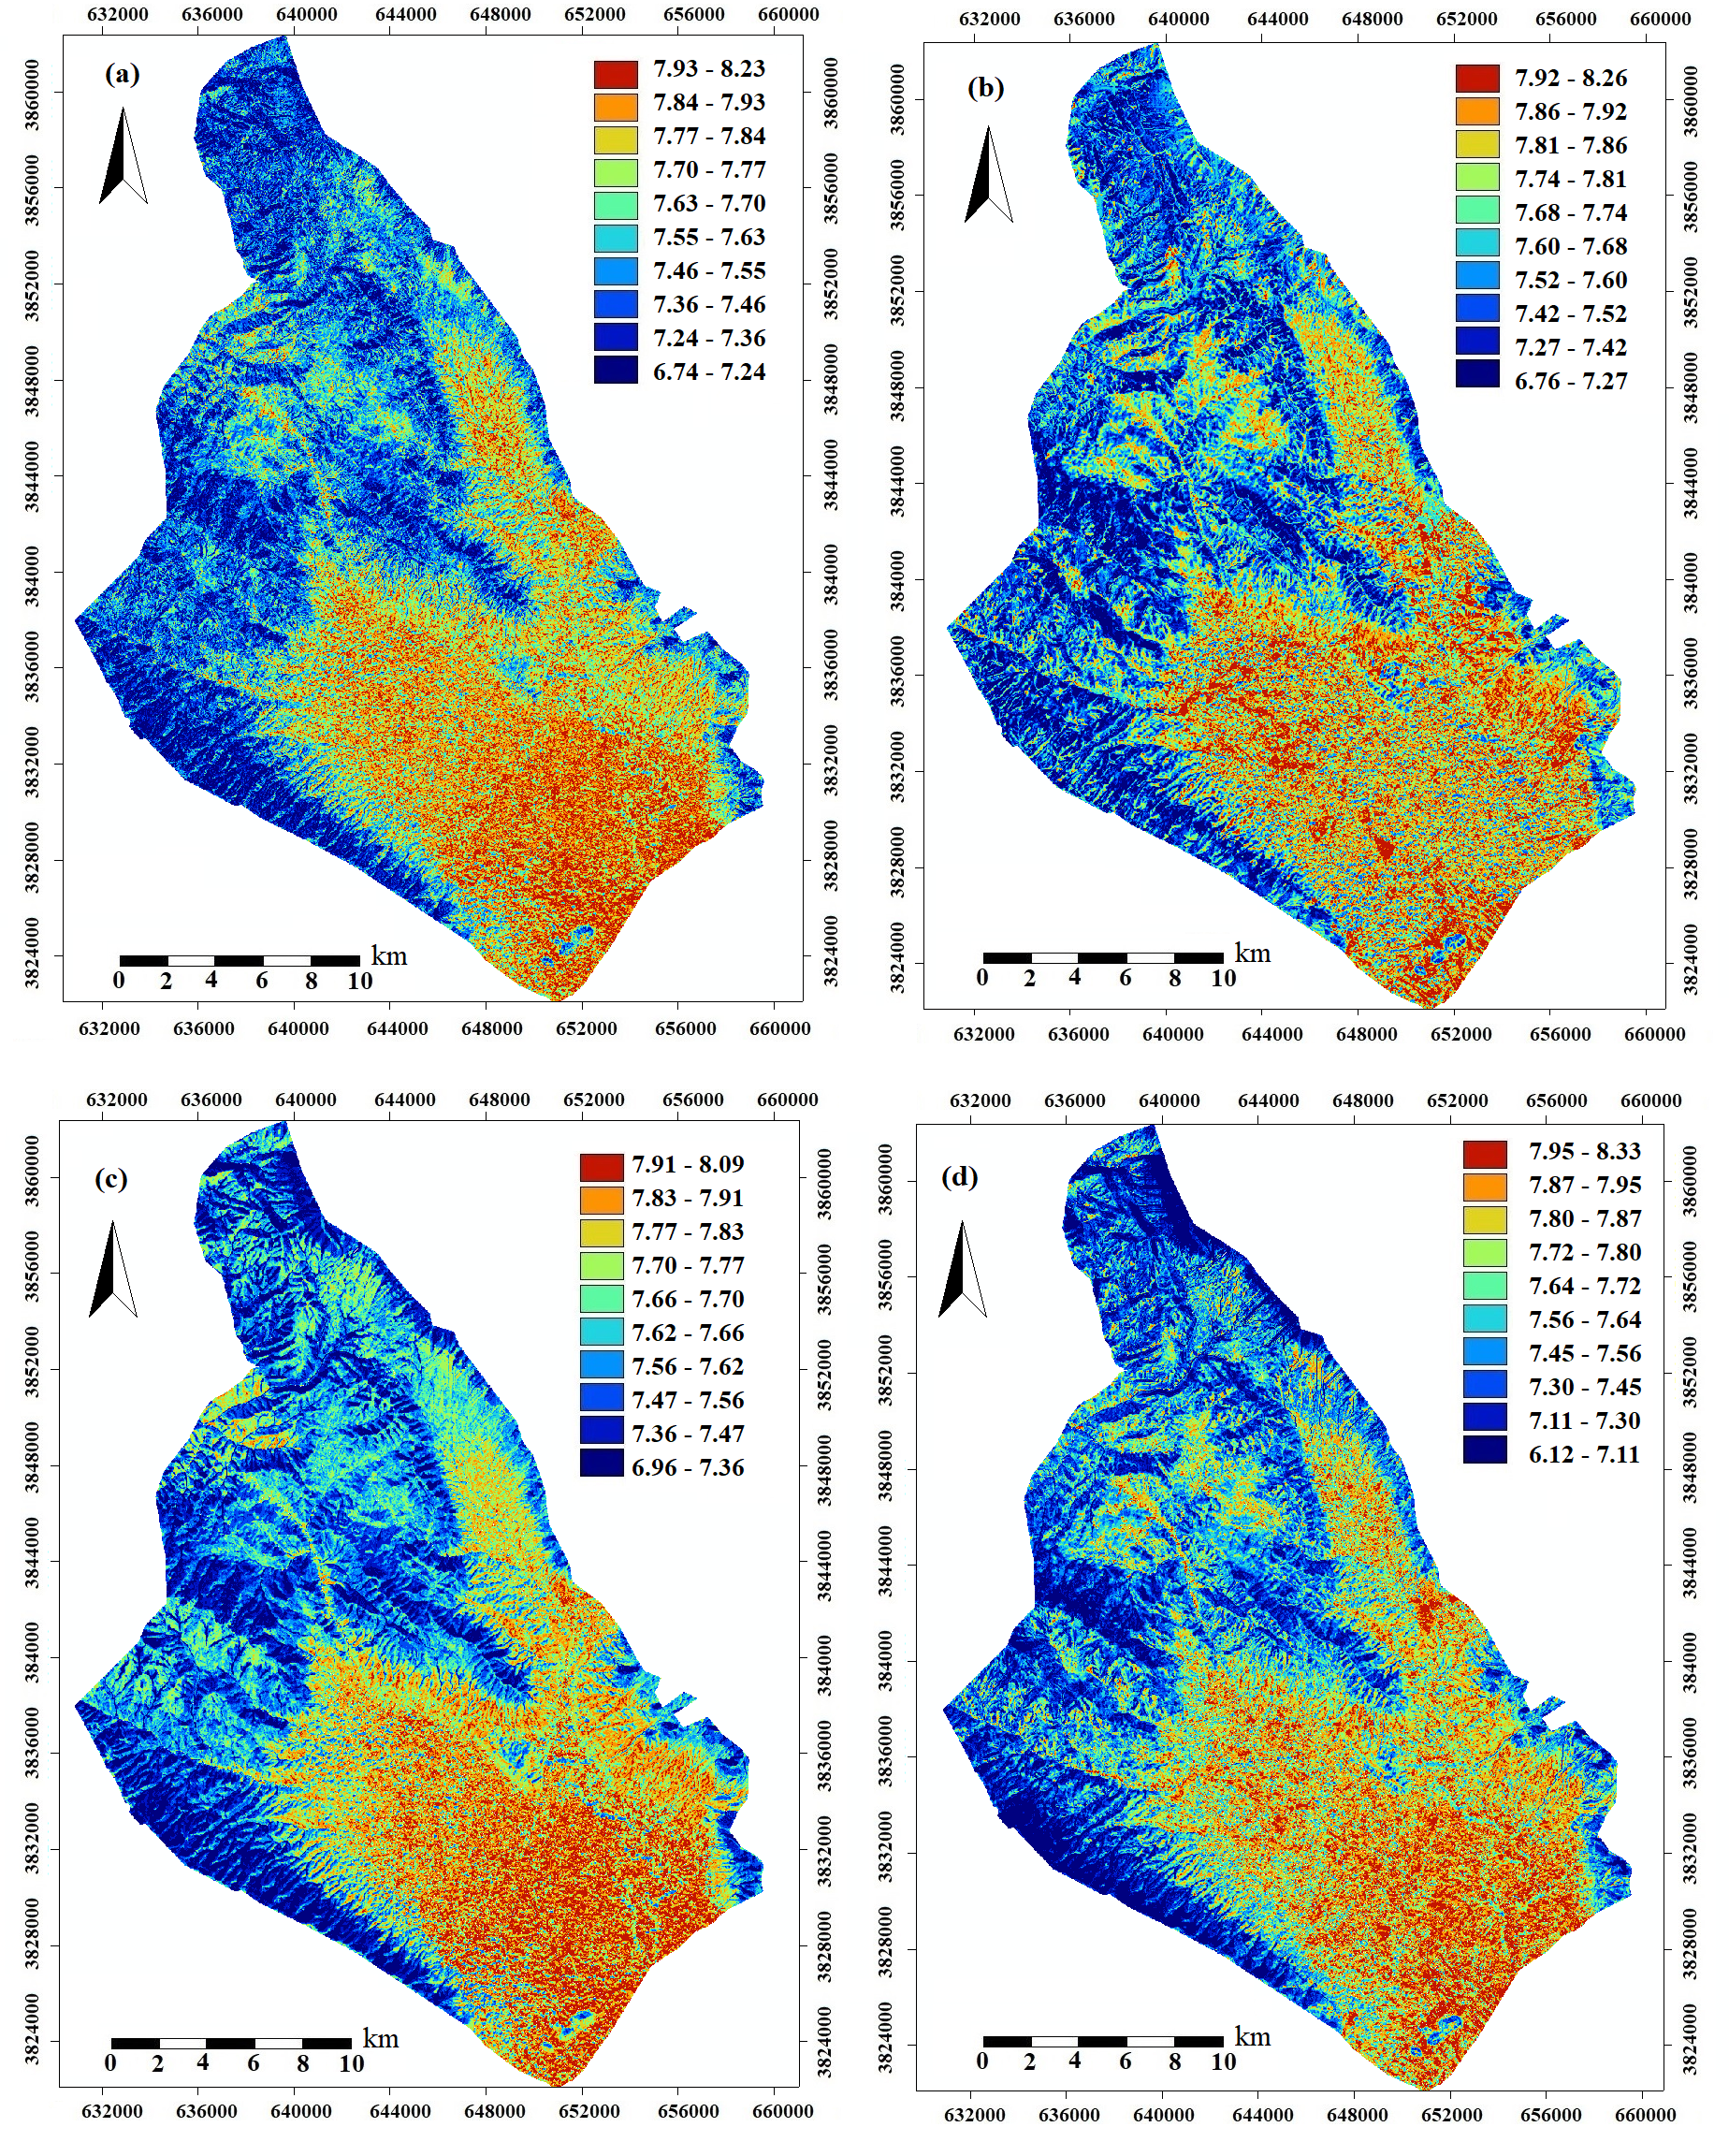


**Fig 4.** Spatial prediction maps of soil pH produced by (a) XGBoost, (b) SVM, (c) RF, and (d) Cubist models using the SA-FS1 method.


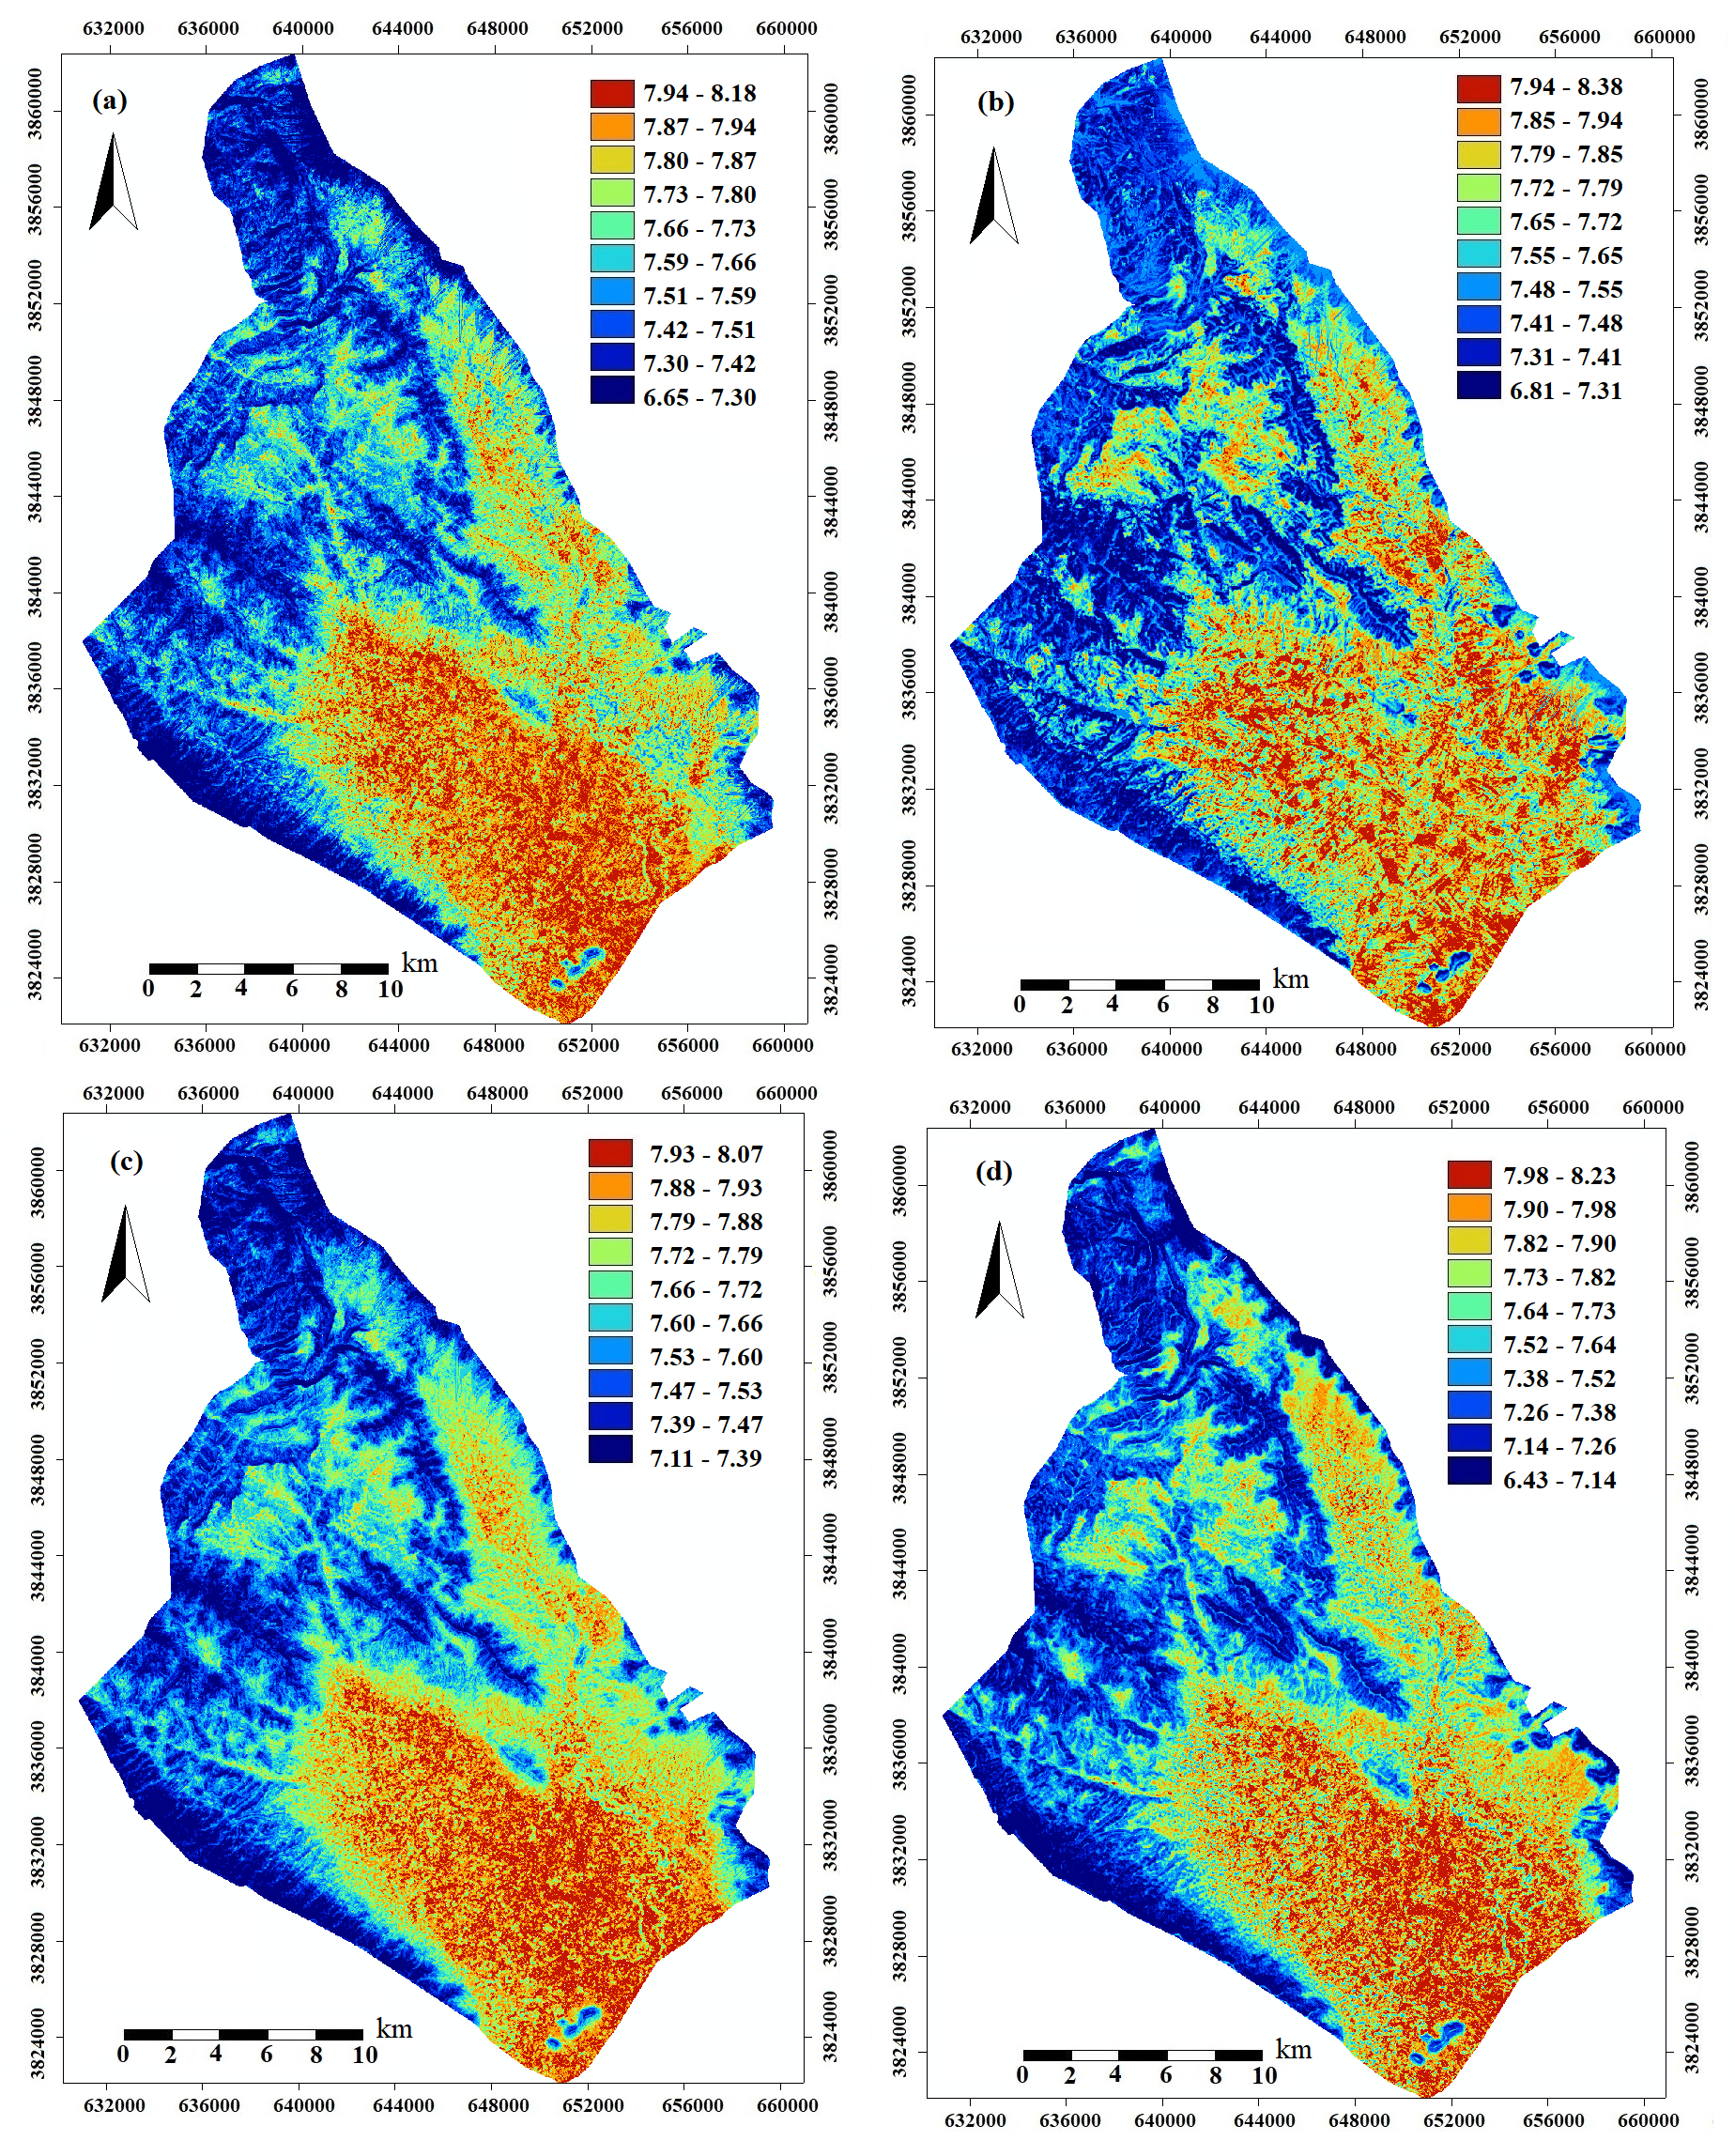


**Fig 5.** Spatial prediction maps of soil pH produced by (a) XGBoost, (b) SVM, (c) RF, and (d) Cubist models using the SA-FS2 method.


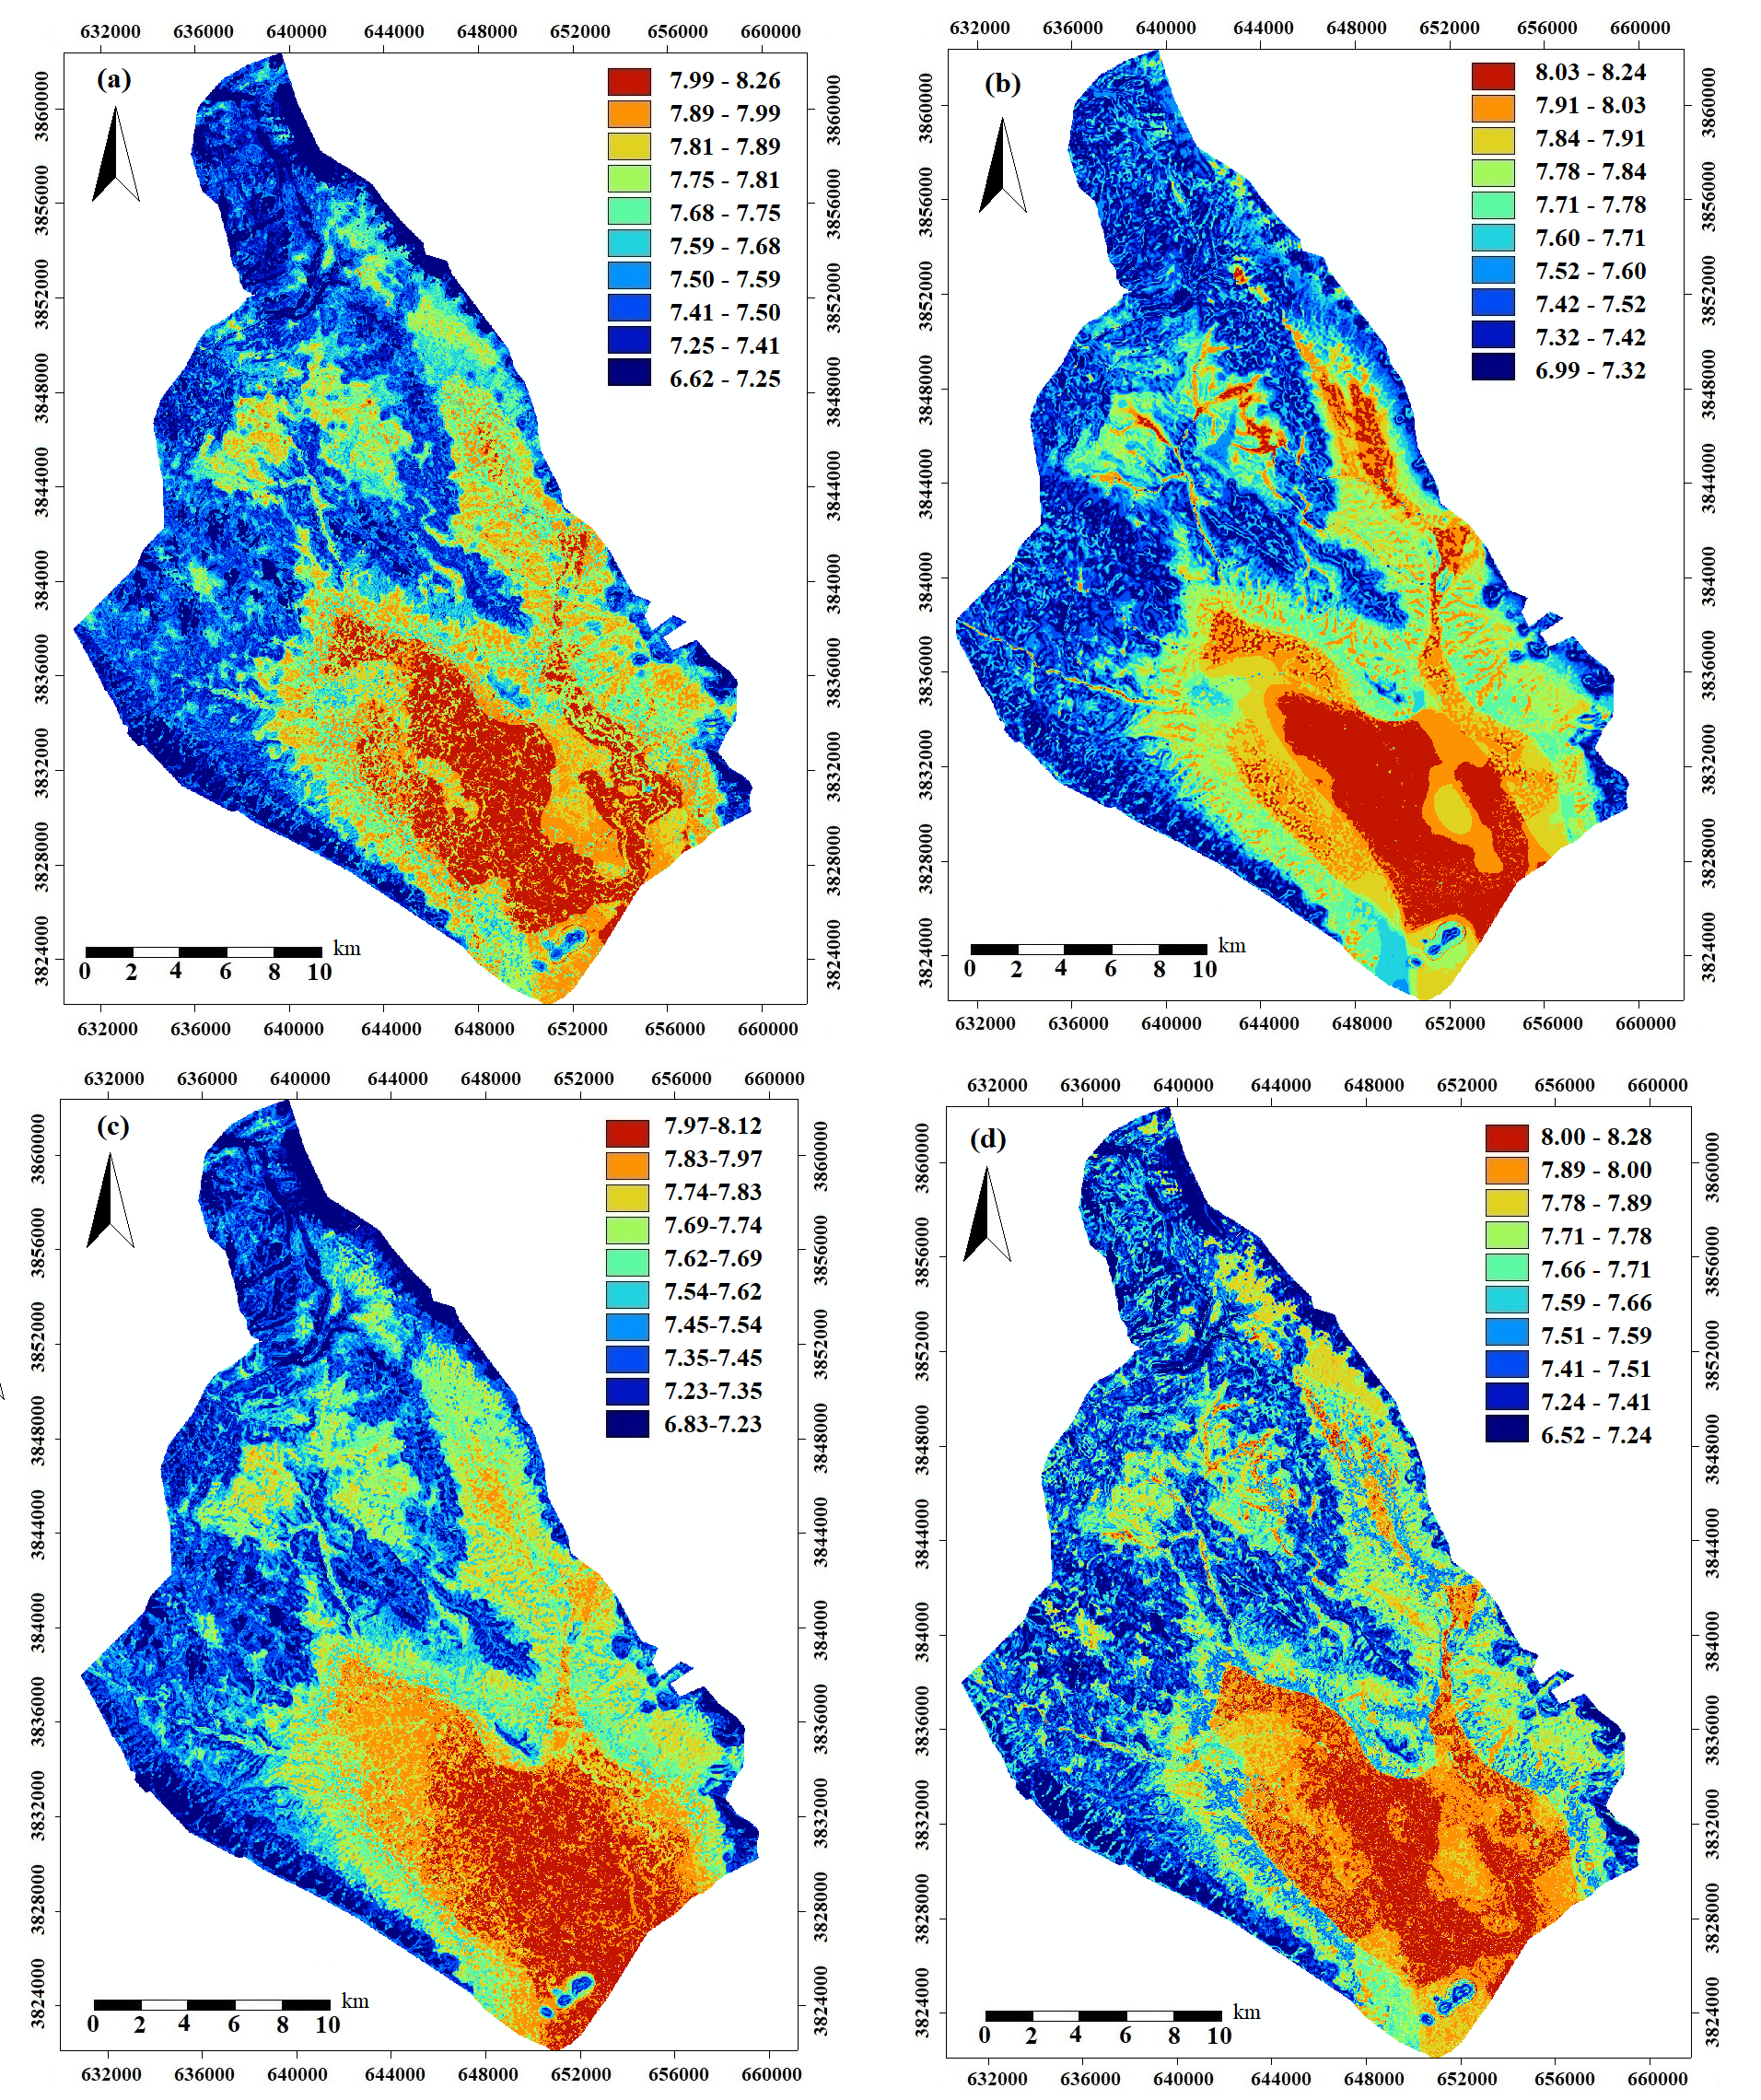


**Fig 6.** Spatial prediction maps of soil pH produced by (a) XGBoost, (b) SVM, (c) RF, and (d) Cubist models using the GA-FS1 method.


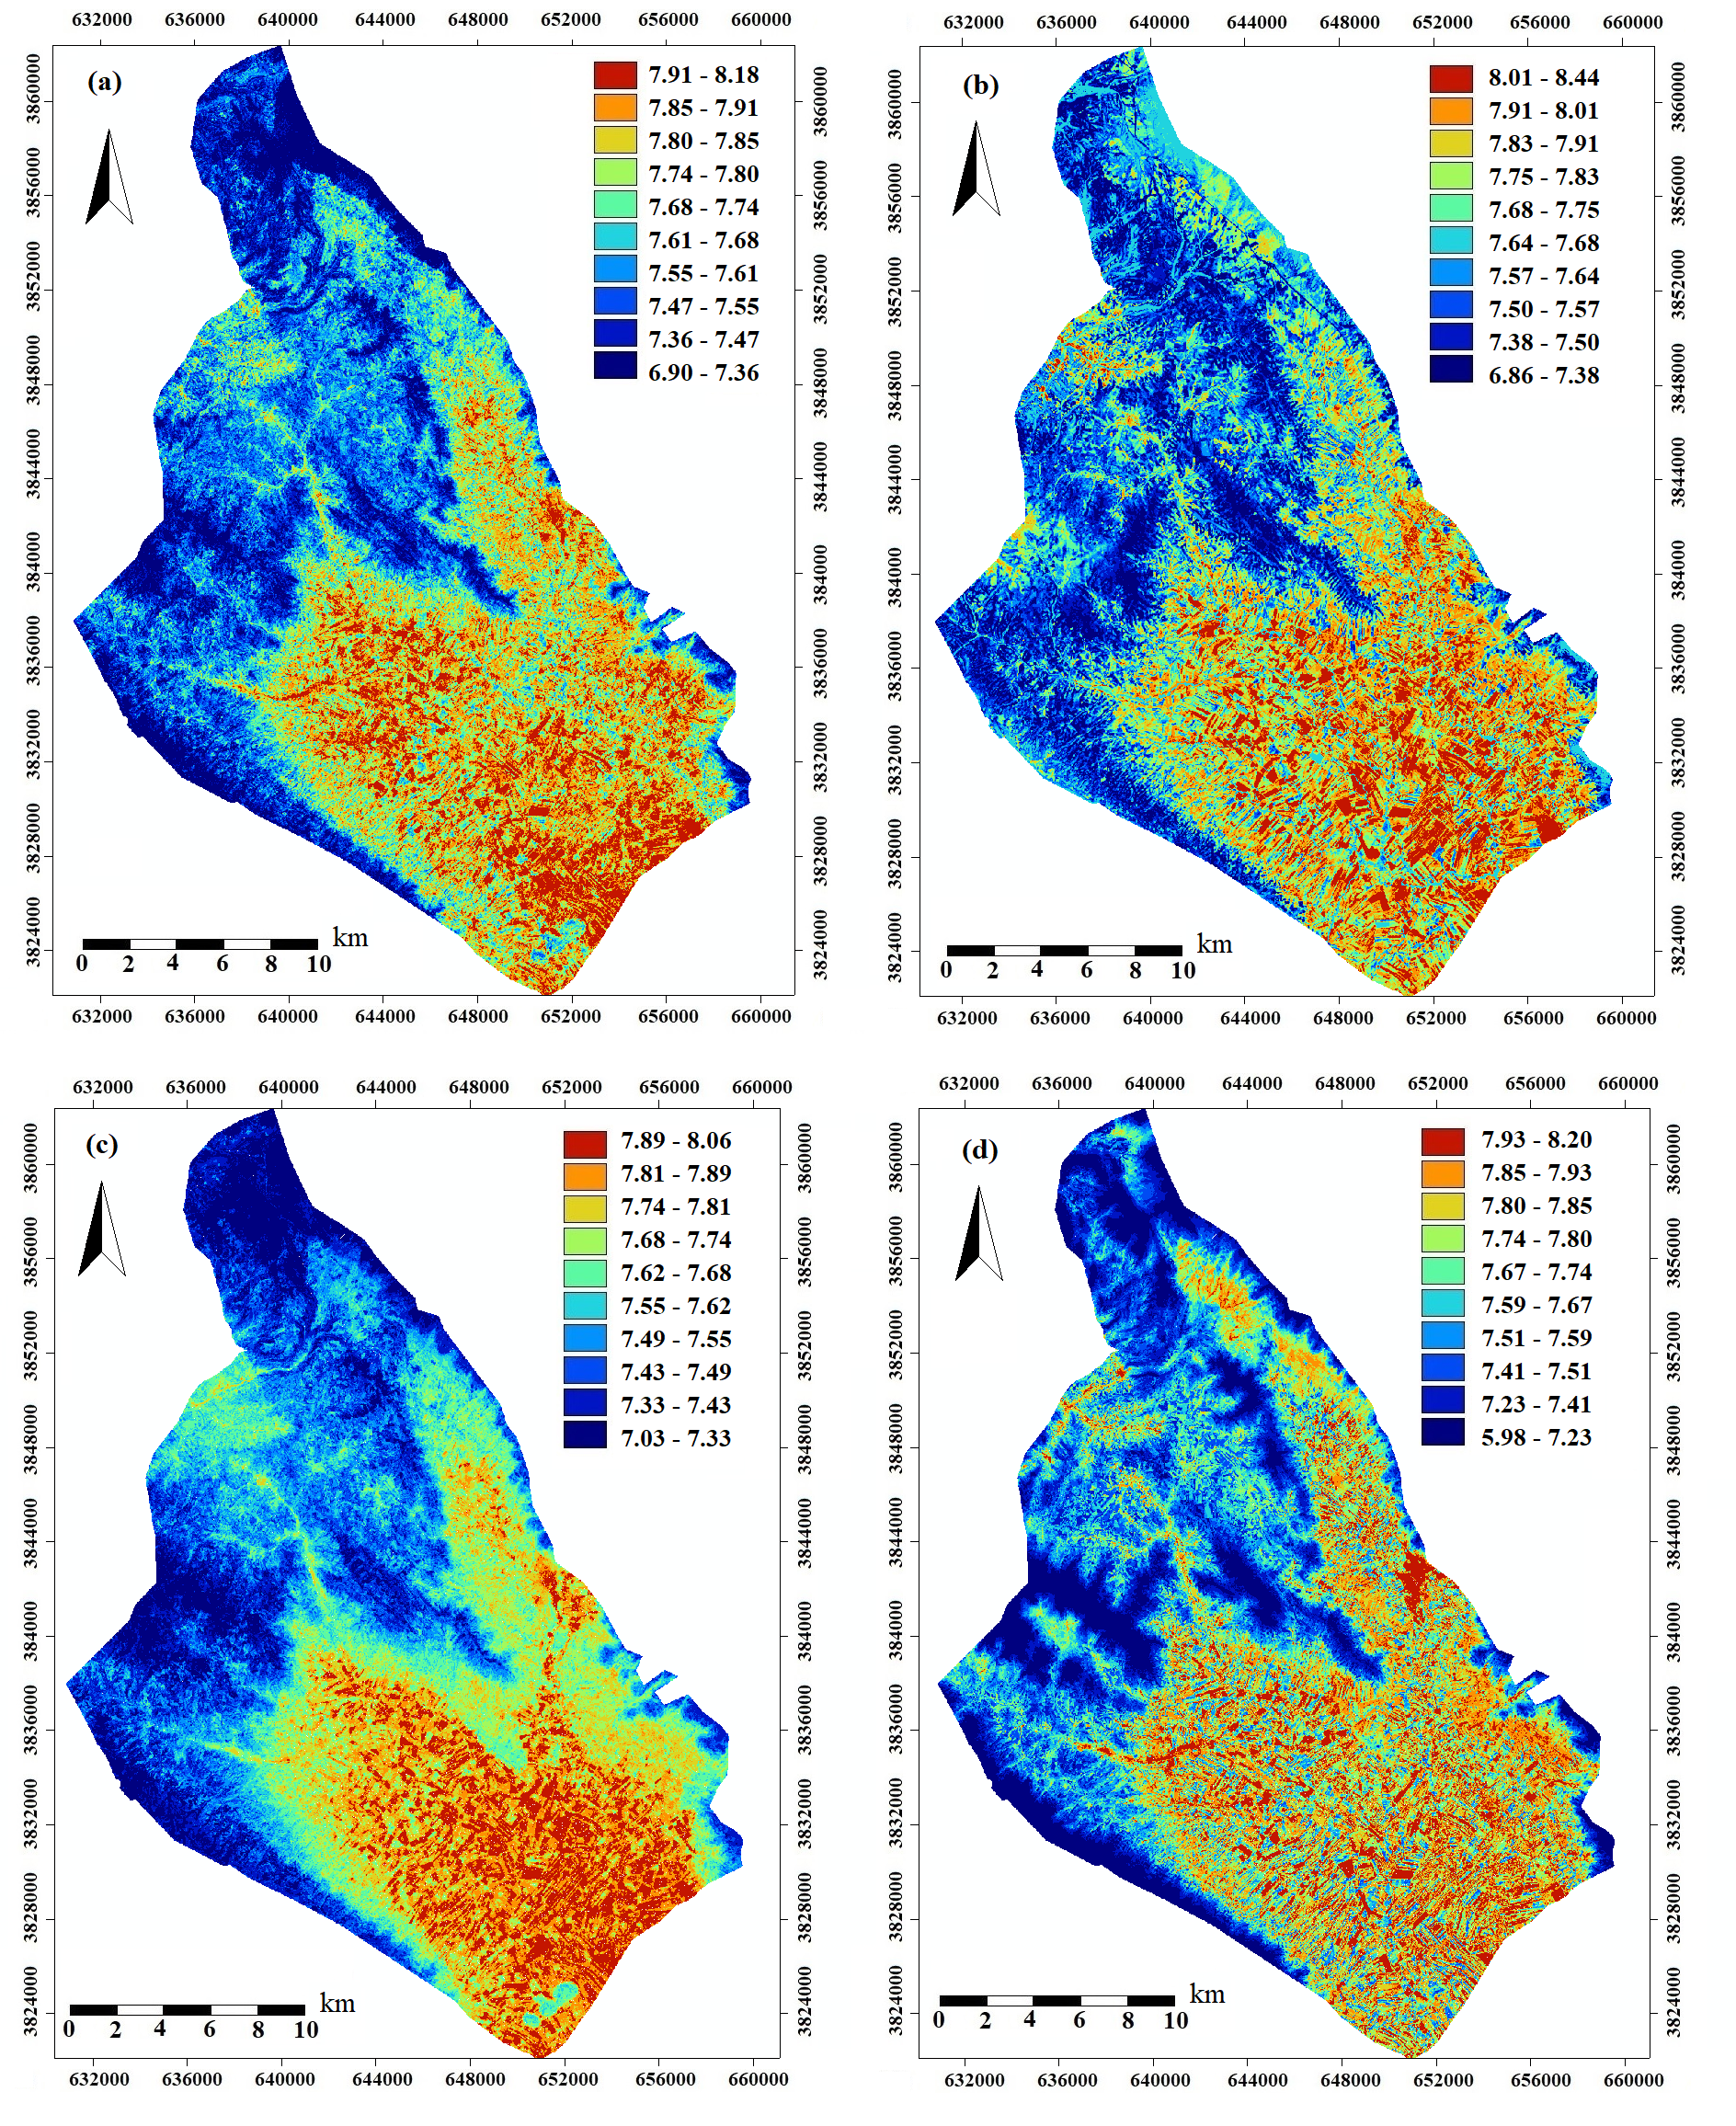


**Fig 7.** Spatial prediction maps of soil pH produced by (a) XGBoost, (b) SVM, (c) RF, and (d) Cubist models using the GA-FS2 method.
